# Supplementary material for: Help Seeking and Mental Health Service Utilization Among College Students With a History of Suicide Ideation
Source: Atypon-hosted journal article supplement (doi:10.1176/appi.ps.005562010), 2011-12-01

**Figure 1**

**“How many times did you or someone else ever think you needed help or treatment for problems with your emotions, nerves, or mental health?”** For first episode, proceed to Episode 1, Box A; if no episodes reported, end section.

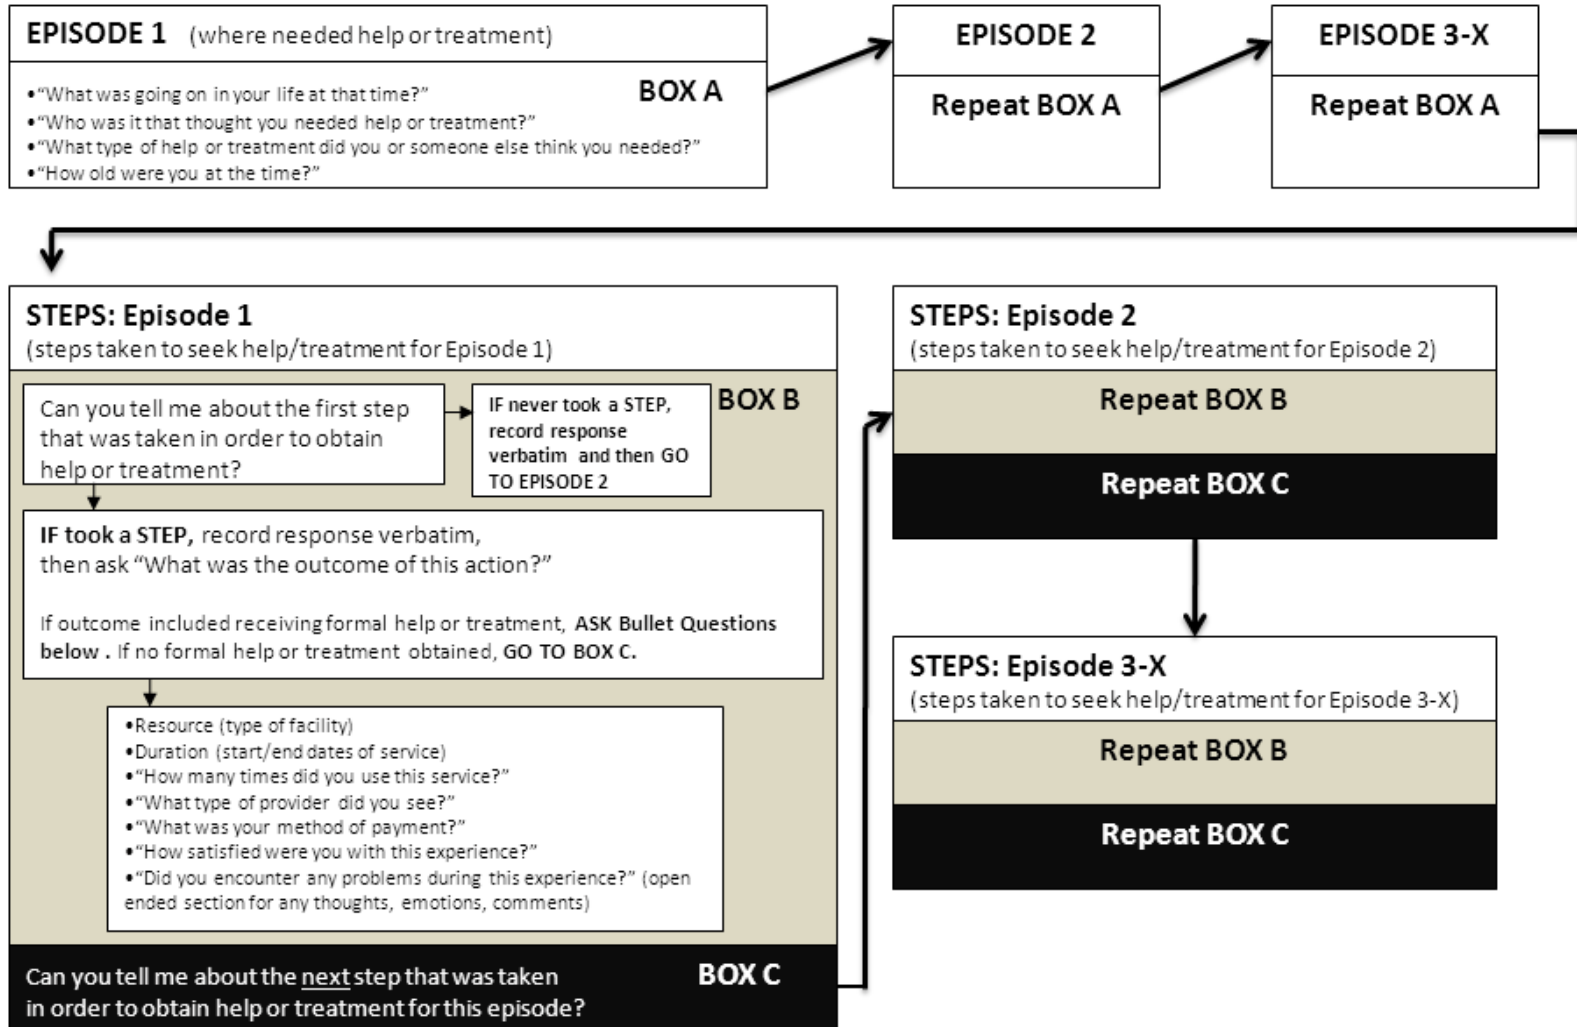

Supplement: pss6212_1510_ds1.pdf [file pss6212_1510_ds1.pdf]
